# Supplementary material
Source: Springer Nature journal article supplement (https://www.springermedizin.de/resource/supplementary/12943_2009_644_MOESM6_ESM.pdf/9554472)

**A**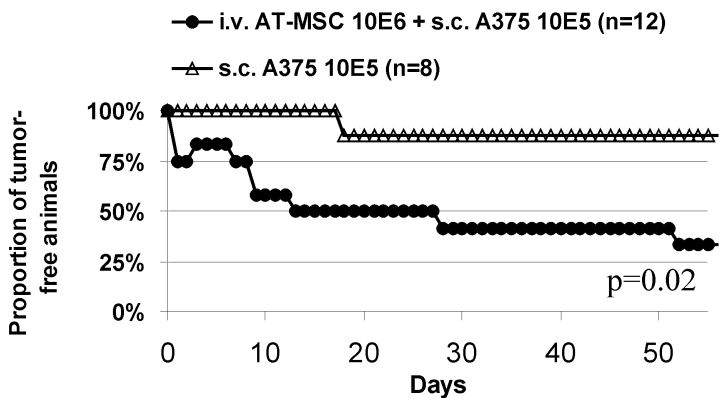**B**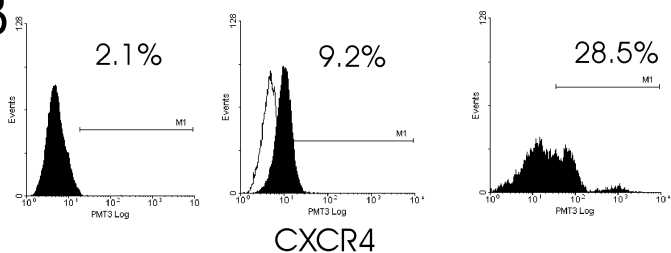**C**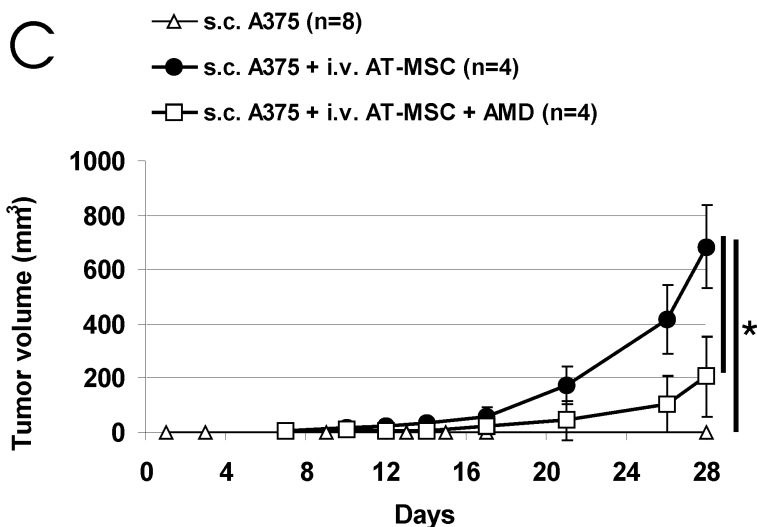

Supplement: MOESM6 [file 9554472]
